# Supplementary material for: Precise timing of transcription by c-di-GMP coordinates cell cycle and morphogenesis in Caulobacter
Source: PubMed Central journal article supplement (PMC7010744; doi:10.1038/s41467-020-14585-6), 2020-02-10
Supplement: 41467_2020_14585_MOESM2_ESM.pdf [file 41467_2020_14585_MOESM2_ESM.pdf]

## Description of Additional Supplementary Files

File Name: Supplementary Data 1

Description: **Sequence alignment of ShkA orthologs.** This sequence alignment (in FASTA format) underlies the phylogenetic tree and Weblogos shown in Supplementary Figs 3a, b and 4a.

File Name: Supplementary Data 2

Description: **List of plasmids used in this study.**

File Name: Supplementary Data 3

Description: **List of oligonucleotides used in this study.**

File Name: Supplementary Data 4

Description: **List of strains used in this study.**
